# Supplementary material for: Exploring the potential of thermal infrared remote sensing to improve a snowpack model through an observing system simulation experiment
Source: Copernicus journal article supplement (doi:10.5194/tc-17-3329-2023), 2023-08-17
Supplement: Supplementary file 1 [file tc-17-3329-2023-supplement.pdf]

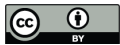

*Supplement of*

## **Exploring the potential of thermal infrared remote sensing to improve a snowpack model through an observing system simulation experiment**

**Esteban Alonso-González et al.**

*Correspondence to:* Esteban Alonso-González ([esteban.alonso-gonzalez@univ-tlse3.fr](mailto:esteban.alonso-gonzalez@univ-tlse3.fr))

The copyright of individual parts of the supplement might differ from the article licence.

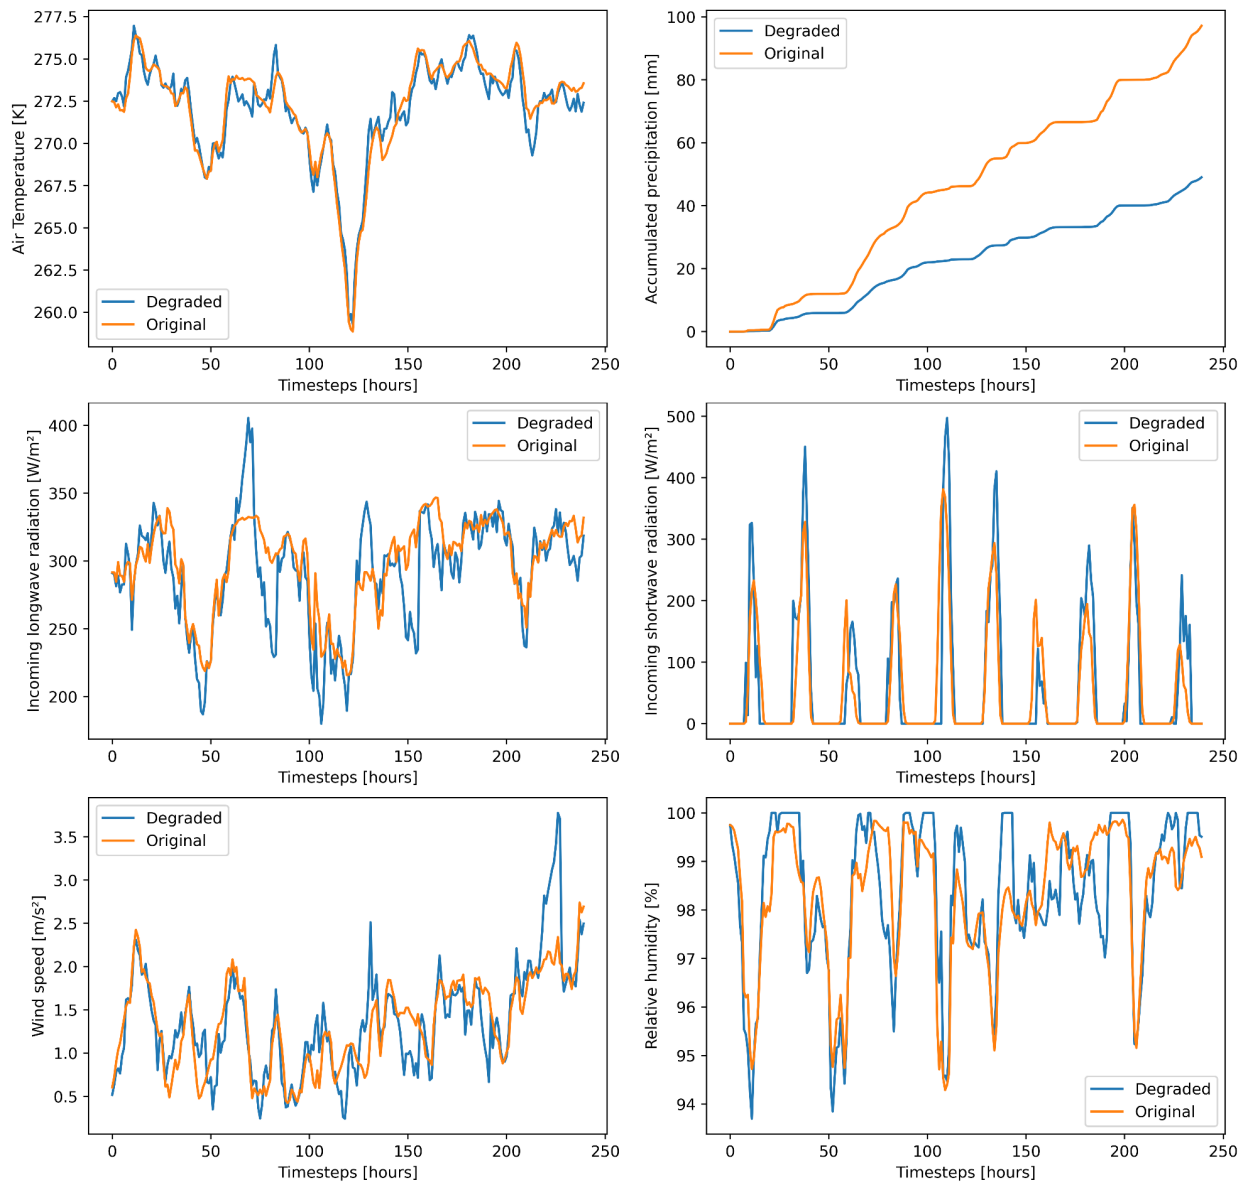

Figure S1: Example of the forcing degradation covering 10 days at hourly timesteps

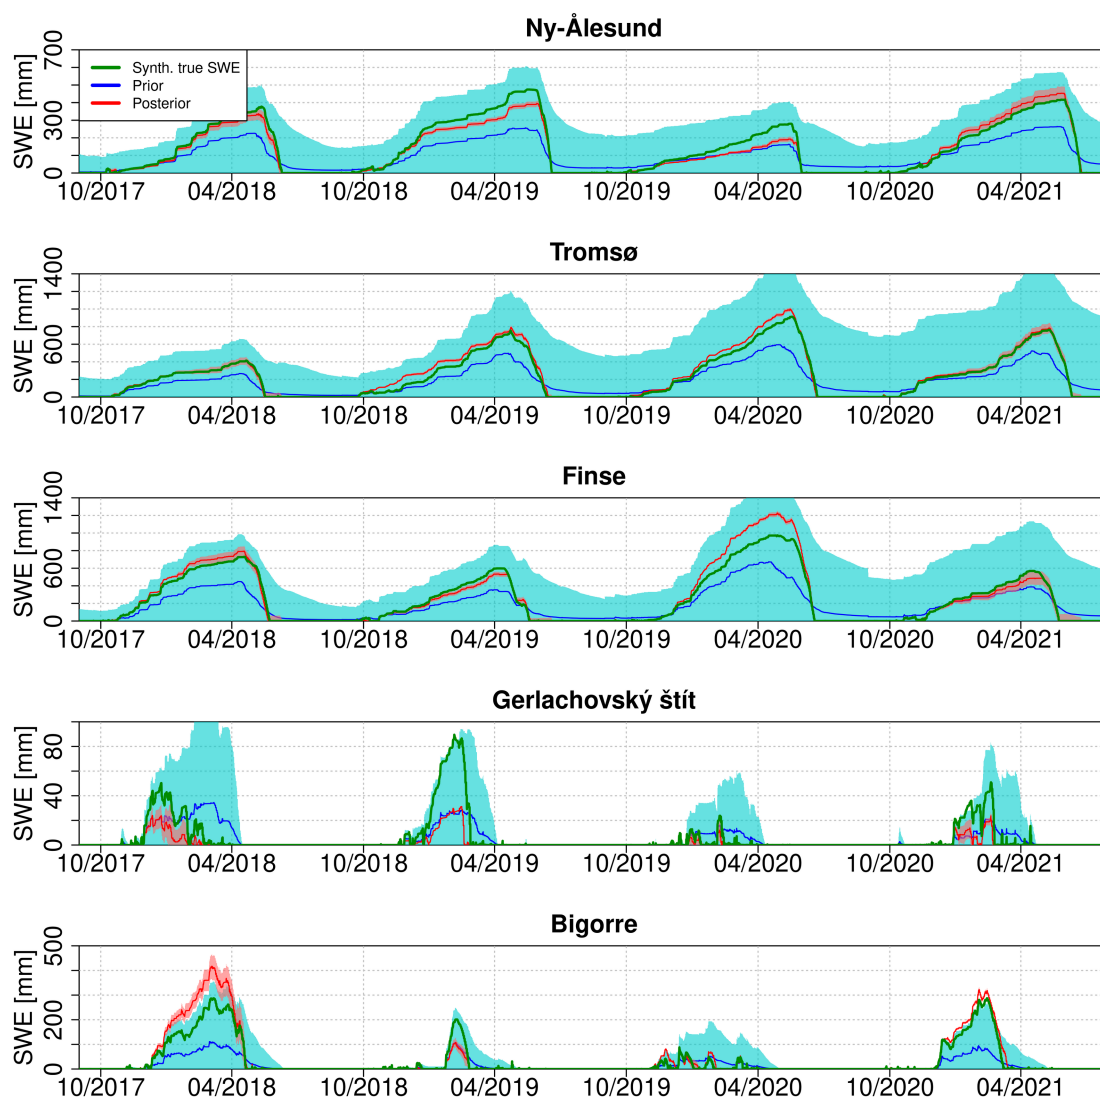

Figure S2 Example of prior and posterior SWE ensembles for a single replicate assimilating LST at a time resolution of 3 days in the absence of clouds. The shaded areas show the prior and posterior standard deviation.

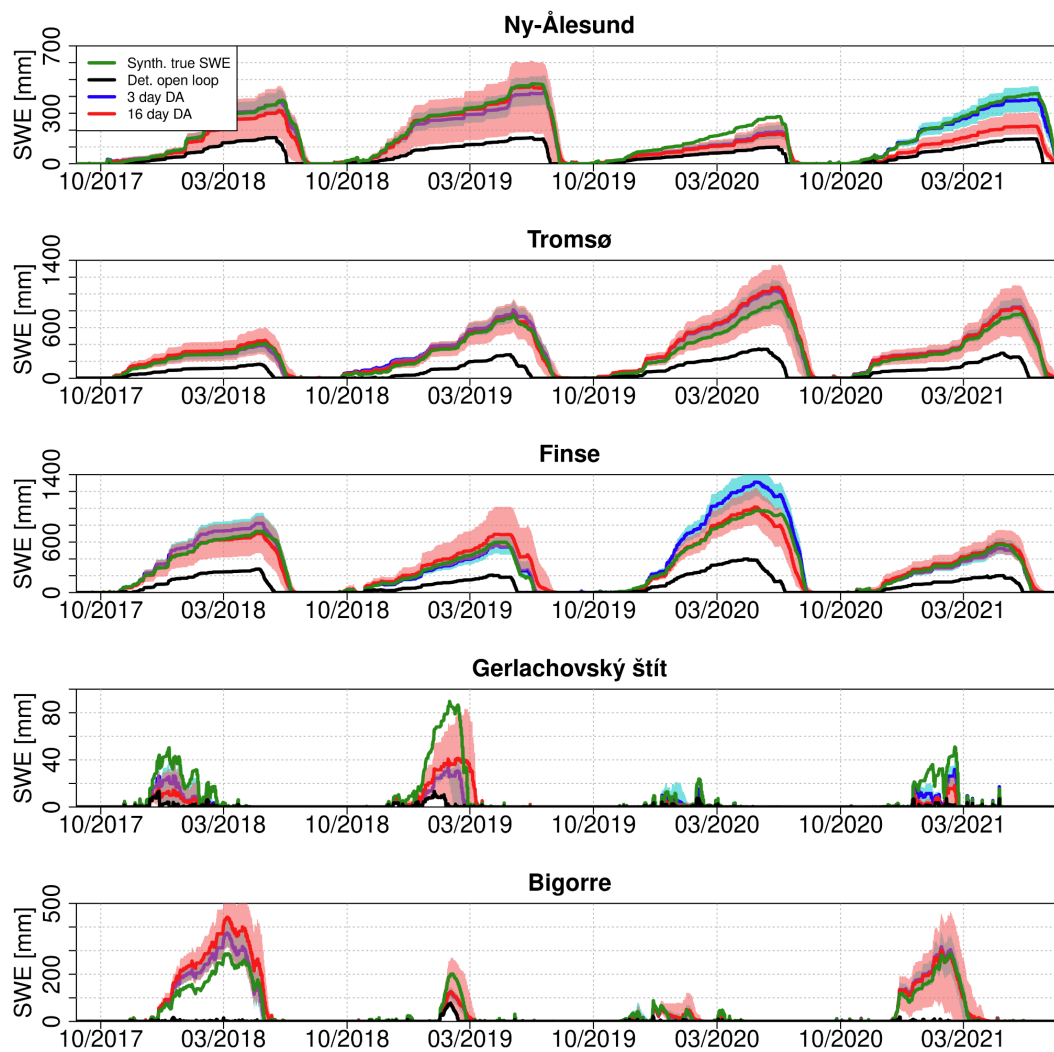

Figure S3: Comparison of hourly time series of synthetic true SWE with the open loop simulations and the posterior SWE after assimilating LST with a revisit time of 16 days or 3 days (25% cloud cover scenario) using the PBS. Here, the posterior SWE is the average of the 100 replicates and the shaded areas represent the 95 to 5th quantile range

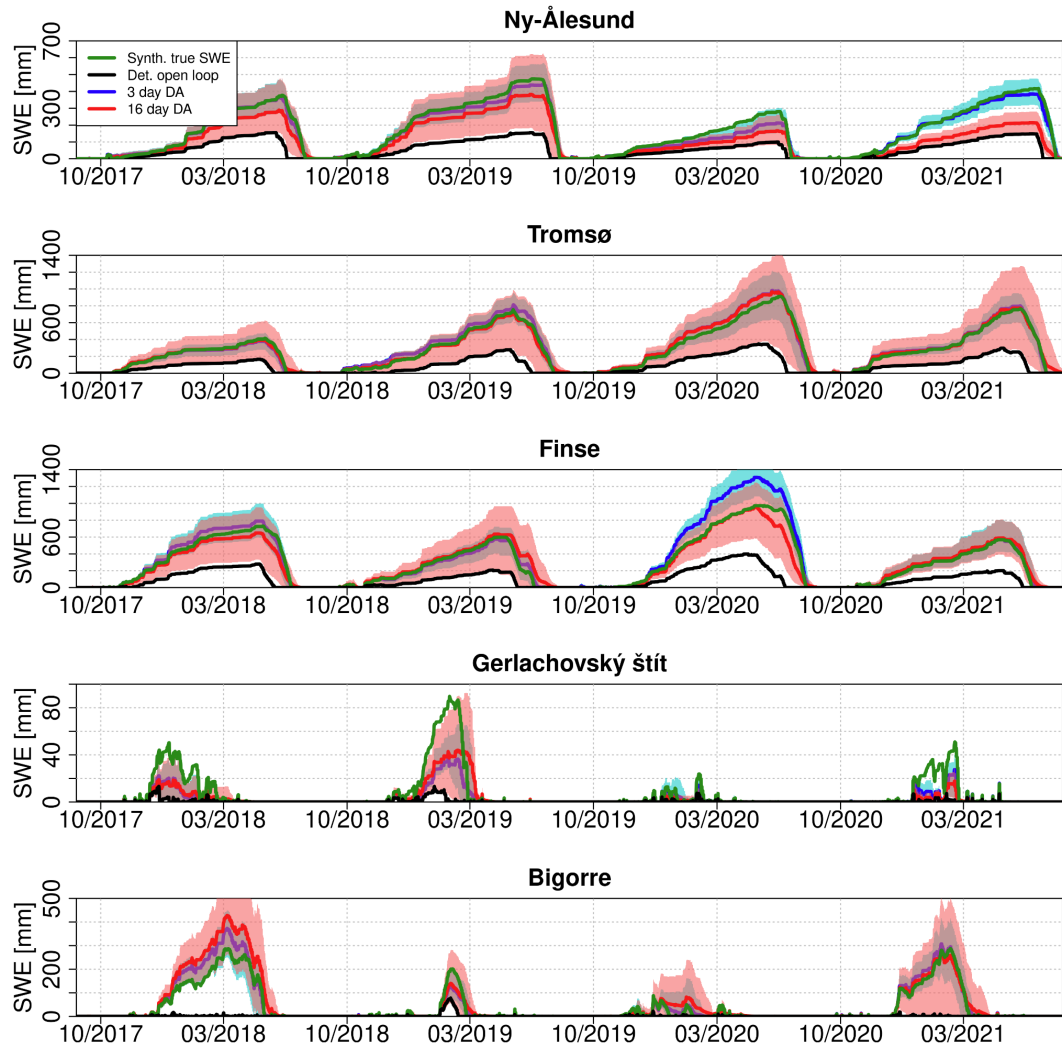

Figure S4: Comparison of hourly time series of synthetic true SWE with the open loop simulations and the posterior SWE after assimilating LST with a revisit time of 16 days or 3 days (50% cloud cover scenario) using the PBS. Here, the posterior SWE is the average of the 100 replicates and the shaded areas represent the 95 to 5th quantile range.

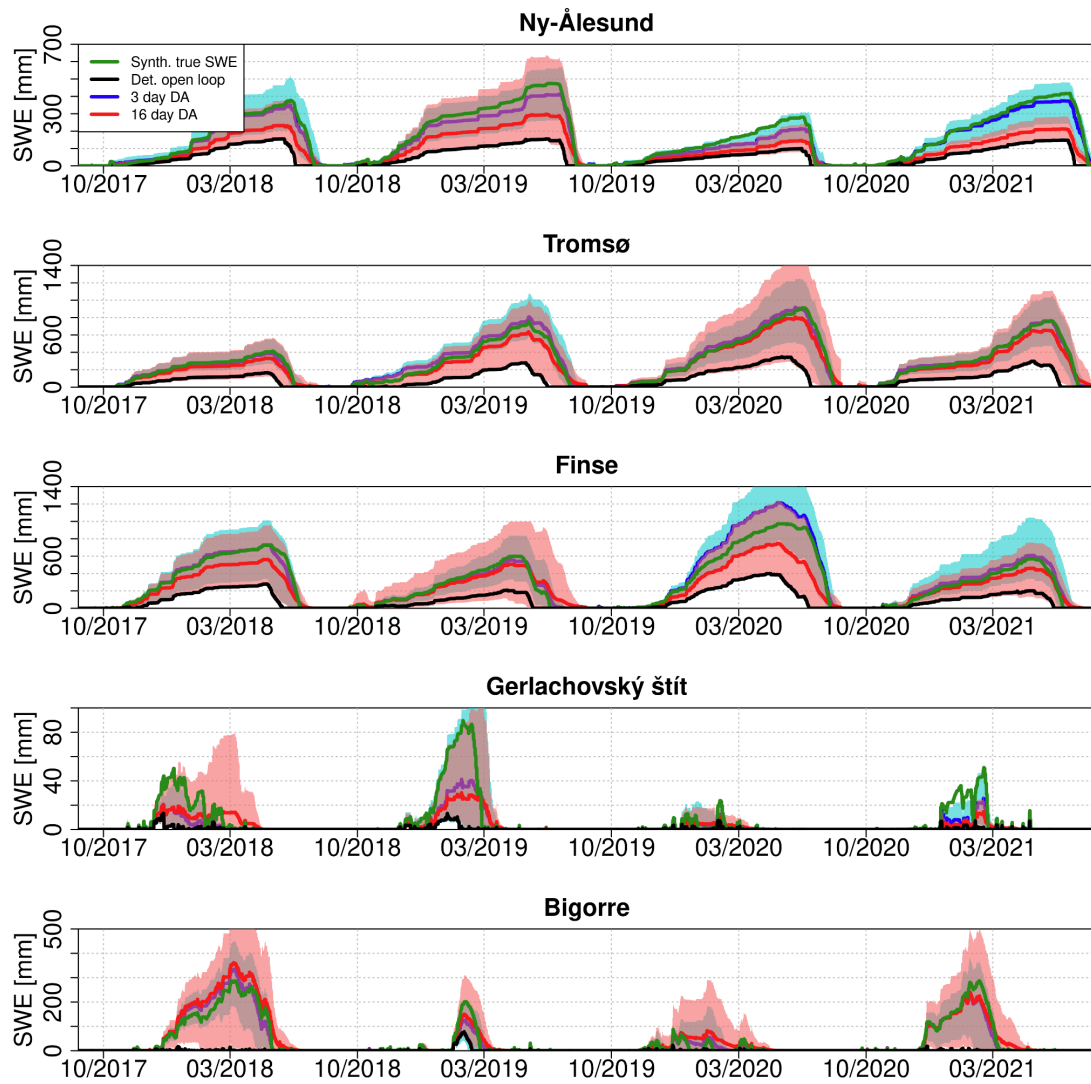

Figure S5: Comparison of hourly time series of synthetic true SWE with the open loop simulations and the posterior SWE after assimilating LST with a revisit time of 16 days or 3 days (75% cloud cover scenario) using the PBS. Here, the posterior SWE is the average of the 100 replicates and the shaded areas represent the 95 to 5th quantile range.
